# Supplementary material for: Genetics of Stay-Green Trait and Its Association with Leaf Spot Tolerance and Pod Yield in Groundnut
Source: Hindawi journal article supplement (doi:10.1155/2019/3064026), 2019-07-30
Supplement: f1 [file 3064026.f1.pdf]

**Table S1:** Number of green leaves (NGL) of 25 groundnut genotypes evaluated under disease conditions

| Genotypes           | Number at pod initiation |            |     | Number at physiological maturity |            |     |
|---------------------|--------------------------|------------|-----|----------------------------------|------------|-----|
|                     | Estimate                 | Std. Error | Sig | Estimate                         | Std. Error | Sig |
| CHINESE (Intercept) | 31.29                    | 3.976      | *** | 21.65                            | 13.408     | ns  |
| GAF 1665            | 30.56                    | 4.501      | *** | 177.13                           | 18.266     | *** |
| GAF 1723            | 35.91                    | 4.390      | *** | 146.87                           | 17.964     | *** |
| GK 7                | 22.72                    | 4.503      | *** | 97.87                            | 18.269     | *** |
| ICG 7878            | 23.31                    | 4.492      | *** | 99.14                            | 18.248     | *** |
| ICGV-IS 00064       | 13.70                    | 4.512      | **  | 121.91                           | 18.285     | *** |
| ICGV-IS 08837       | 4.11                     | 4.508      | ns  | 21.12                            | 18.278     | ns  |
| ICGV-IS 13015       | -1.33                    | 4.513      | ns  | 40.71                            | 18.287     | *   |
| ICGV-IS 13018       | -6.27                    | 4.383      | ns  | 9.12                             | 17.952     | ns  |
| ICGV-IS 13041       | 3.34                     | 4.503      | ns  | 13.94                            | 18.268     | ns  |
| ICGV-IS 13045       | 3.51                     | 4.385      | ns  | 73.64                            | 17.955     | *** |
| ICGV-IS 13052       | 3.38                     | 4.373      | ns  | 25.69                            | 17.934     | ns  |
| ICGV-IS 13071       | -4.47                    | 4.276      | ns  | 21.04                            | 17.656     | ns  |
| ICGV-IS 13078       | -5.40                    | 4.498      | ns  | 11.02                            | 18.259     | ns  |
| ICGV-IS 13079       | -7.62                    | 4.384      | ns  | 21.08                            | 17.953     | ns  |
| ICGV-IS 13081       | 1.33                     | 4.506      | ns  | 34.79                            | 18.275     | ns  |
| ICGV-IS 13086       | -4.57                    | 4.275      | ns  | 8.72                             | 17.656     | ns  |
| ICGV-IS 13110       | -6.98                    | 4.503      | ns  | 10.42                            | 18.268     | ns  |
| ICGV-IS 13113       | -5.37                    | 4.491      | ns  | 35.61                            | 18.247     | ns  |
| ICGV-IS 13114       | 3.04                     | 4.492      | ns  | 51.93                            | 18.248     | **  |
| ICGV-IS 13998       | -2.67                    | 4.403      | ns  | 32.21                            | 17.986     | ns  |
| KPANI ELI           | 31.84                    | 4.397      | *** | 127.68                           | 17.976     | *** |
| NKATIESARI          | 21.33                    | 4.403      | *** | 141.77                           | 17.986     | *** |
| SUMNUT 23           | 5.56                     | 4.498      | ns  | 31.20                            | 18.259     | ns  |
| YENYAWOSO           | -0.77                    | 4.506      | ns  | 21.25                            | 18.275     | ns  |

\*, \*\* and \*\*\* significant at 0.05, 0.01 and 0.001 levels of probability, respectively. ns-not significant.

**Table S2:** Leave area (LA) and number of green leaves (NGL) of 25 groundnut genotypes evaluated under disease-free conditions

| Genotypes           | LA at pod initiation |            |     | NGL at pod initiation |            |     | NGL at physiological maturity |            |     |
|---------------------|----------------------|------------|-----|-----------------------|------------|-----|-------------------------------|------------|-----|
|                     | Estimate             | Std. Error | Sig | Estimate              | Std. Error | Sig | Estimate                      | Std. Error | Sig |
| CHINESE (Intercept) | 7.93                 | 0.659      | *** | 7.73                  | 0.610      | *** | 13.99                         | 0.703      | *** |
| GAF 1665            | -4.78                | 0.866      | *** | -1.00                 | 0.610      | ns  | -3.36                         | 0.880      | *** |
| GAF 1723            | -3.53                | 0.866      | *** | 0.00                  | 0.610      | ns  | -1.90                         | 0.880      | *   |
| GK 7                | -3.57                | 0.866      | *** | 0.07                  | 0.610      | ns  | -2.67                         | 0.880      | **  |
| ICG 7878            | -4.86                | 0.866      | *** | 0.33                  | 0.610      | ns  | -2.86                         | 0.869      | **  |

|               |       |       |     |       |       |    |       |       |     |
|---------------|-------|-------|-----|-------|-------|----|-------|-------|-----|
| ICGV-IS 00064 | -3.93 | 0.866 | *** | -0.47 | 0.610 | ns | -2.11 | 0.869 | *   |
| ICGV-IS 08837 | -1.55 | 0.866 | ns  | -0.13 | 0.610 | ns | -3.37 | 0.869 | *** |
| ICGV-IS 13015 | -2.90 | 0.866 | **  | -1.33 | 0.610 | *  | -3.50 | 0.880 | *** |
| ICGV-IS 13018 | -0.37 | 0.866 | ns  | -0.27 | 0.610 | ns | -2.41 | 0.869 | **  |
| ICGV-IS 13041 | -0.59 | 0.866 | ns  | -0.73 | 0.610 | ns | -2.29 | 0.880 | *   |
| ICGV-IS 13045 | -1.80 | 0.866 | *   | 0.13  | 0.610 | ns | -0.68 | 0.880 | ns  |
| ICGV-IS 13052 | -0.87 | 0.866 | ns  | -0.40 | 0.610 | ns | -3.03 | 0.880 | **  |
| ICGV-IS 13071 | -1.77 | 0.866 | *   | -1.60 | 0.610 | *  | -3.87 | 0.869 | *** |
| ICGV-IS 13078 | -1.78 | 0.866 | *   | -1.07 | 0.610 | ns | -4.05 | 0.880 | *** |
| ICGV-IS 13079 | -1.37 | 0.866 | ns  | -1.33 | 0.610 | *  | -3.56 | 0.869 | *** |
| ICGV-IS 13081 | -1.09 | 0.866 | ns  | -1.20 | 0.610 | ns | -3.14 | 0.869 | *** |
| ICGV-IS 13086 | -0.56 | 0.866 | ns  | -1.27 | 0.610 | *  | -4.51 | 0.869 | *** |
| ICGV-IS 13110 | -1.19 | 0.866 | ns  | -0.73 | 0.610 | ns | -3.33 | 0.880 | *** |
| ICGV-IS 13113 | -1.72 | 0.866 | ns  | -1.27 | 0.610 | *  | -3.42 | 0.880 | *** |
| ICGV-IS 13114 | -1.38 | 0.866 | ns  | -0.40 | 0.610 | ns | -0.08 | 0.869 | ns  |
| ICGV-IS 13998 | -1.88 | 0.866 | *   | -0.87 | 0.610 | ns | -3.14 | 0.869 | *** |
| KPANIELLI     | -4.29 | 0.866 | *** | 1.00  | 0.610 | ns | -2.78 | 0.869 | **  |
| NKATIESARI    | -3.58 | 0.866 | *** | -0.33 | 0.610 | ns | -3.90 | 0.880 | *** |
| SUMNUT        | -4.67 | 0.866 | *** | -0.73 | 0.610 | ns | -2.61 | 0.869 | **  |
| YENYAWOSO     | -3.03 | 0.866 | **  | 0.27  | 0.610 | ns | -2.32 | 0.880 | *   |

\*, \*\* and \*\*\*-significant at 0.05, 0.01 and 0.001 levels of probability, respectively. ns-not significant. LA-leaf area, NGL-number of green leaves

**Table S3:** Pod yield and its reduction due to ELS-LLS infection of 25 groundnut genotypes evaluated under disease and disease-free conditions

| Genotypes           | Pod yield (t ha <sup>-1</sup> ) under disease condition |            |     | Pod yield (t ha <sup>-1</sup> ) under disease-free condition |            |     | Reduction in pod yield (t ha <sup>-1</sup> ) under disease |            |     |
|---------------------|---------------------------------------------------------|------------|-----|--------------------------------------------------------------|------------|-----|------------------------------------------------------------|------------|-----|
|                     | Estimate                                                | Std. Error | Sig | Estimate                                                     | Std. Error | Sig | Estimate                                                   | Std. Error | Sig |
| CHINESE (Intercept) | 2.23                                                    | 0.649      | **  | 7.67                                                         | 1.212      | *** | 4.95                                                       | 1.451      | **  |
| GAF 1665            | 2.27                                                    | 0.838      | **  | -3.53                                                        | 1.436      | *   | -5.49                                                      | 1.766      | **  |
| GAF 1723            | 2.53                                                    | 0.832      | **  | -2.18                                                        | 1.436      | ns  | -3.69                                                      | 1.766      | *   |
| GK 7                | 2.13                                                    | 0.838      | *   | -2.13                                                        | 1.436      | ns  | -3.61                                                      | 1.766      | *   |
| ICG 7878            | 2.02                                                    | 0.838      | *   | -0.73                                                        | 1.436      | ns  | -2.45                                                      | 1.766      | ns  |
| ICGV-IS 00064       | 3.78                                                    | 0.839      | *** | -2.95                                                        | 1.436      | *   | -6.24                                                      | 1.766      | *** |
| ICGV-IS 08837       | 1.81                                                    | 0.839      | *   | -2.22                                                        | 1.436      | ns  | -3.44                                                      | 1.766      | ns  |
| ICGV-IS 13015       | 0.76                                                    | 0.839      | ns  | -4.54                                                        | 1.436      | **  | -4.72                                                      | 1.766      | *   |
| ICGV-IS 13018       | 0.80                                                    | 0.832      | ns  | -2.73                                                        | 1.436      | ns  | -2.98                                                      | 1.766      | ns  |
| ICGV-IS 13041       | 0.66                                                    | 0.838      | ns  | -3.39                                                        | 1.436      | *   | -3.49                                                      | 1.766      | ns  |
| ICGV-IS 13045       | 1.40                                                    | 0.857      | ns  | -4.15                                                        | 1.436      | **  | -5.63                                                      | 1.766      | **  |
| ICGV-IS 13052       | 1.27                                                    | 0.832      | ns  | -3.69                                                        | 1.436      | *   | -4.15                                                      | 1.766      | *   |
| ICGV-IS 13071       | 0.54                                                    | 0.826      | ns  | -4.18                                                        | 1.436      | **  | -4.02                                                      | 1.766      | *   |
| ICGV-IS 13078       | 1.32                                                    | 0.838      | ns  | -2.94                                                        | 1.436      | *   | -3.45                                                      | 1.766      | ns  |
| ICGV-IS 13079       | 1.94                                                    | 0.832      | *   | -3.57                                                        | 1.436      | *   | -4.43                                                      | 1.766      | *   |
| ICGV-IS 13081       | 2.01                                                    | 0.839      | *   | -5.25                                                        | 1.436      | *** | -6.39                                                      | 1.766      | *** |
| ICGV-IS 13086       | 0.56                                                    | 0.826      | ns  | -3.56                                                        | 1.436      | *   | -3.81                                                      | 1.766      | *   |

|               |      |       |     |       |       |     |       |       |     |
|---------------|------|-------|-----|-------|-------|-----|-------|-------|-----|
| ICGV-IS 13110 | 0.93 | 0.838 | ns  | -3.32 | 1.436 | *   | -3.57 | 1.766 | *   |
| ICGV-IS 13113 | 0.84 | 0.838 | ns  | -4.24 | 1.436 | **  | -4.66 | 1.766 | *   |
| ICGV-IS 13114 | 2.04 | 0.838 | *   | -1.60 | 1.436 | ns  | -3.39 | 1.766 | ns  |
| ICGV-IS 13998 | 0.68 | 0.832 | ns  | -5.24 | 1.436 | *** | -5.94 | 1.766 | **  |
| KPANIELI      | 3.39 | 0.832 | *** | -3.67 | 1.436 | *   | -6.58 | 1.766 | *** |
| NKATIESARI    | 3.95 | 0.832 | *** | -1.95 | 1.436 | ns  | -5.09 | 1.766 | **  |
| SUMNUT 23     | 1.66 | 0.838 | *   | -2.03 | 1.436 | ns  | -3.44 | 1.766 | ns  |
| YENYAWOSO     | 1.20 | 0.839 | ns  | -4.59 | 1.436 | **  | -5.98 | 1.766 | **  |

\*, \*\* and \*\*\*-significant at 0.05, 0.01 and 0.001 levels of probability, respectively. ns-not significant
